# Supplementary material
Source: publisher figshare collection journal article supplement (https://acs.figshare.com/ndownloader/files/26273482)
Supplement: Supplementary file 1 [file 26273482]

## Supporting Information

Atomic bonding and Electronic binding energy of two-dimensional Bi/Li(110) heterojunctions via BOLS-BB model

Maolin Bo\*, Liangjing Ge, Jibiao Li, Lei Li, Chuang Yao, Zhongkai Huang

Key Laboratory of Extraordinary Bond Engineering and Advanced Materials Technology (EBEAM) Chongqing, School of Materials Science and Engineering, Yangtze Normal University, Chongqing 408100, China

**Corresponding Author:** \*E-mail: bmlwd@yznu.edu.cn (Maolin Bo)

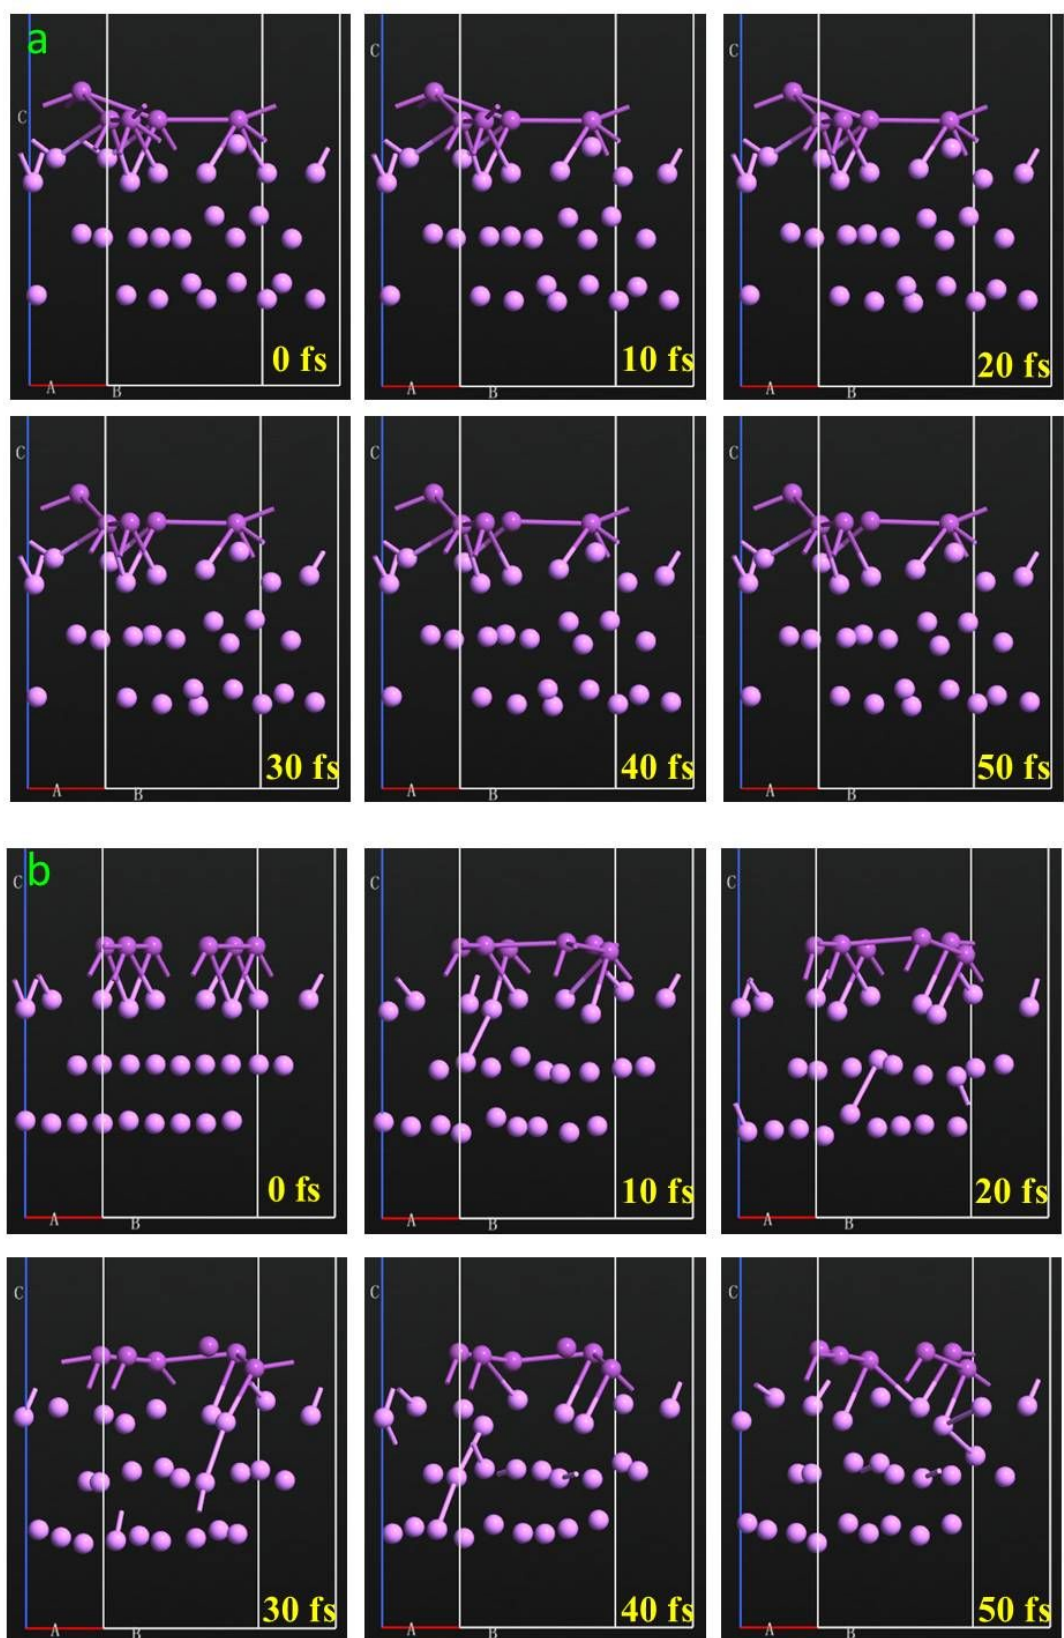

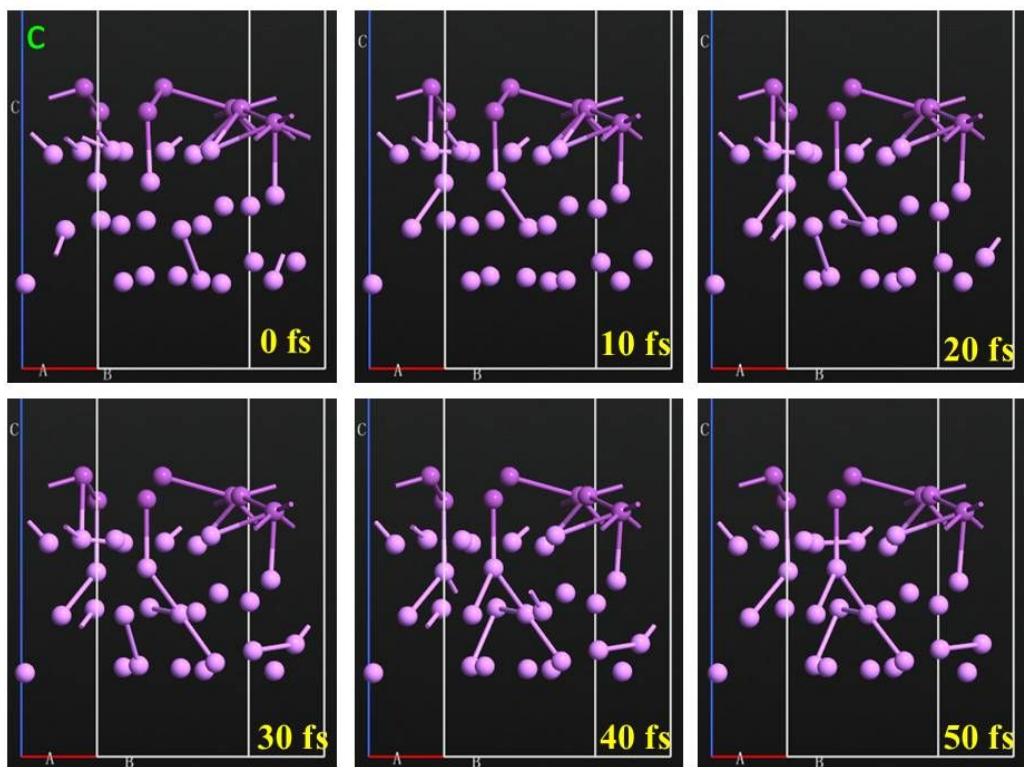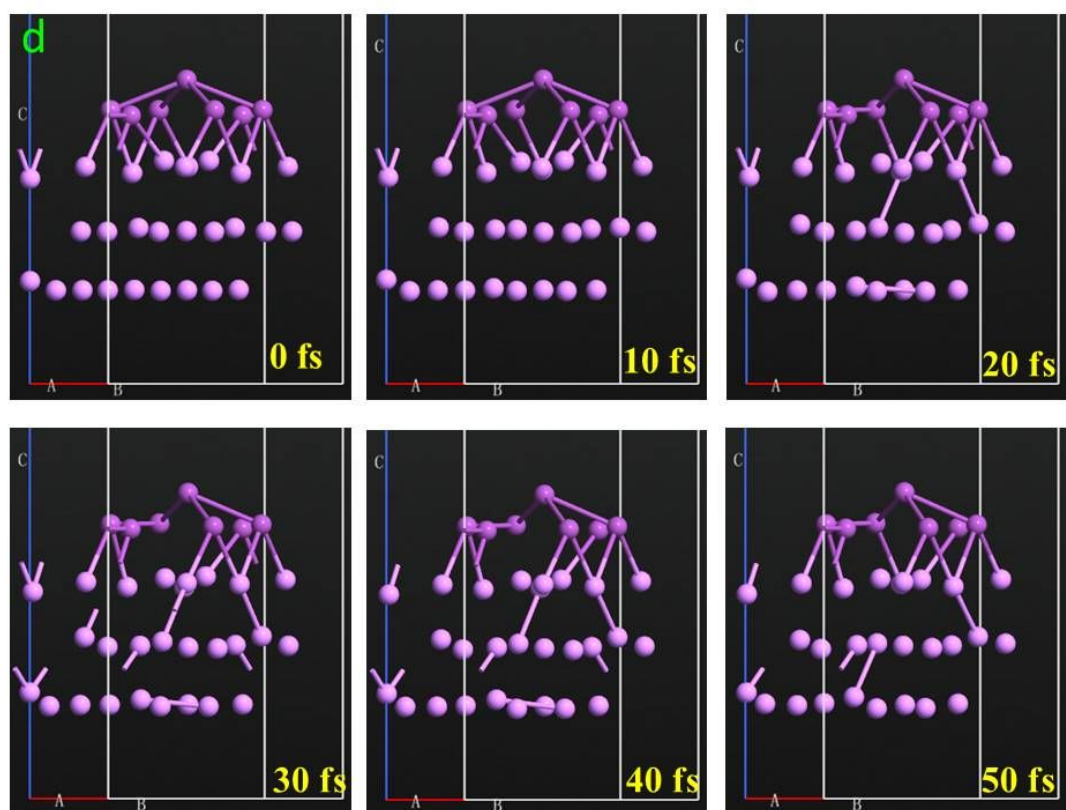

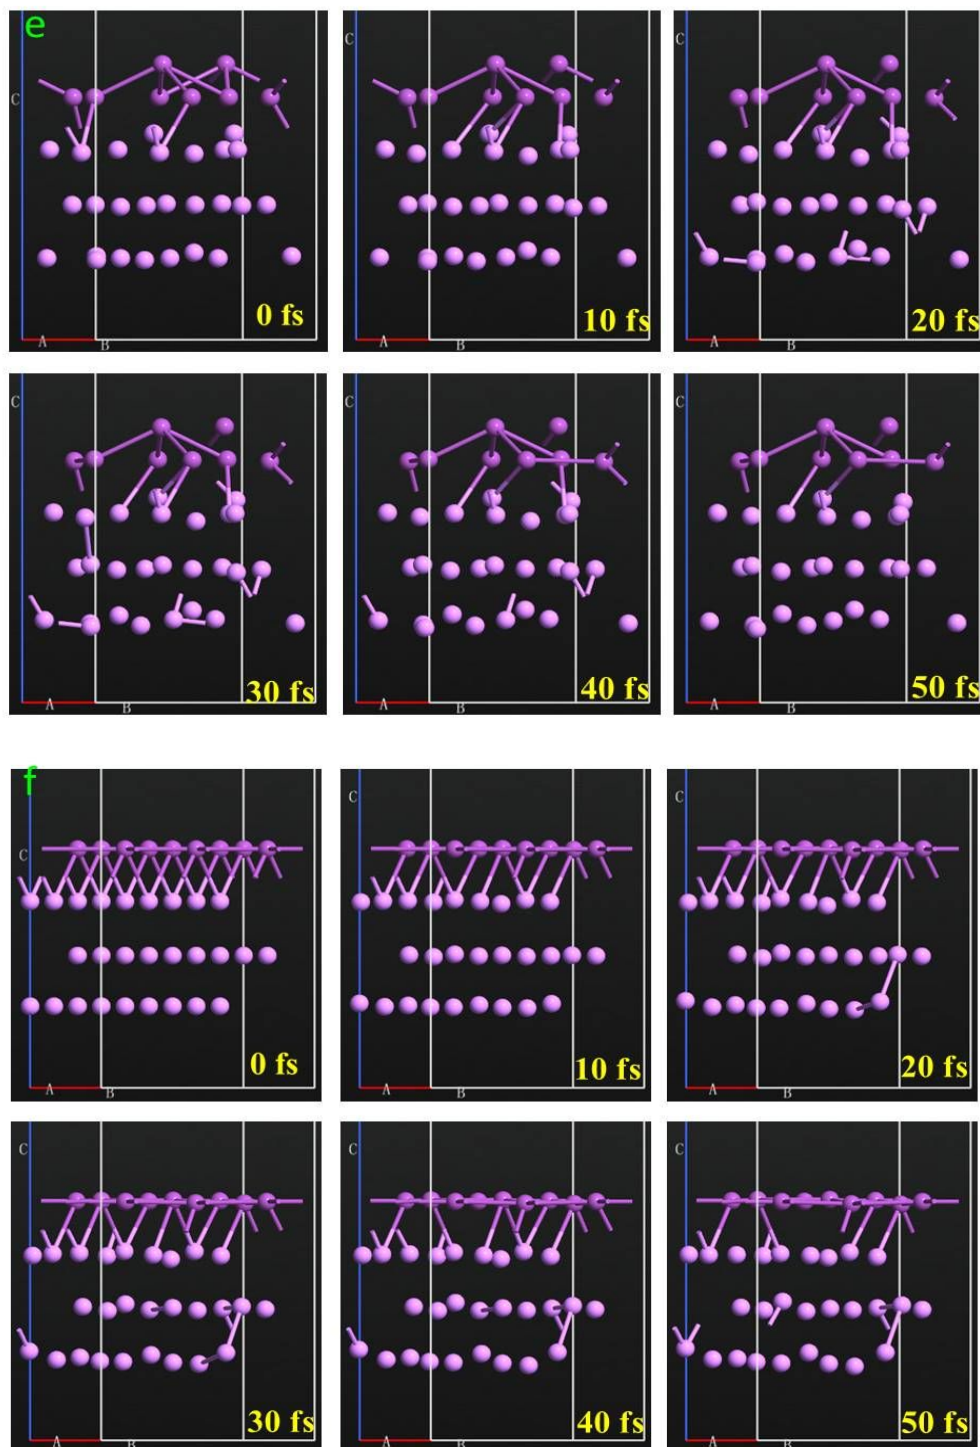

**Figure S1.** The ab initio molecular dynamics calculations show that the structure of Bi atoms on Li (1 1 0) surfaces, (a) letter shape, (b) hexagon shape, (c) cobweb shape, (d) galaxy shape, (e) crown shape, and (f) field shape. The ab initio molecular dynamics calculations show that the structure is stable. The ab initio molecular dynamics simulations show that there is agglomeration of Bi atoms on the interface.
